# Supplementary material for: Effects of a novel anticorrosion engineered nanomaterial on the bivalve Ruditapes philippinarum
Source: Royal Society of Chemistry journal article supplement (doi:10.1039/c6en00630b), 2017-01-01
Supplement: c6en00630b1.pdf [file c6en00630b1.pdf]

Supplementary table 1 – Compilation of endpoints measured after the exposure for 96 h of *Ruditapes phillipinarum* to the unloaded nanomaterial (LDH-NO<sub>3</sub>), the free corrosion inhibitor (MBT) and the nanomaterial with anti-corrosion properties (LDH-MBT). Exposure concentrations (C) ranged from 0 (control – CT) to 100 mg L<sup>-1</sup>. Endpoints included survival (S), air survival capacity (AS), condition index (CI), lipid peroxidation (LPO), ratio between reduced and oxidized glutathiones (GSH:GSSG), catalase (CAT), glutathione peroxidase (GPx), glutathione reductase (GR), glutathione-S-transferases (GSTs), and acetylcholinesterase (AChE). Data are presented as mean values ± standard error.

|                         | C<br>(mg L <sup>-1</sup> ) | S<br>(%) | AS<br>(%) | CI<br>(%) | LPO<br>(nmol<br>TBARS/<br>g WT) | Ratio<br>GSH:<br>GSSG | CAT<br>(µmol/<br>min/mg<br>protein) | GPx<br>(µmol/<br>min/mg<br>protein) | GR<br>(µmol/<br>min/mg<br>protein) | GSTs<br>(µmol/<br>min/mg<br>protein) | AChE<br>(nmol/<br>min/mg<br>protein) |
|-------------------------|----------------------------|----------|-----------|-----------|---------------------------------|-----------------------|-------------------------------------|-------------------------------------|------------------------------------|--------------------------------------|--------------------------------------|
| CT                      | 0                          | 100±0    | 100±4     | 6.1±0.3   | 24.5±2.8                        | 8.2±0.6               | 7.9±0.6                             | 0.289±0.001                         | 0.174±0.008                        | 0.19±0.02                            | 0.31±0.02                            |
| LDH-<br>NO <sub>3</sub> | 0.01                       | 100±0    | 83±13     | 6.2±0.1   | 43.7±11.9                       | 2.7±1.0               | 21.8±2.4                            | 0.279±0.005                         | 0.276±0.007                        | 0.17±0.03                            | 0.24±0.03                            |
|                         | 0.1                        | 100±0    | 93±5      | 6.3±0.2   | 42.7±11.9                       | 1.3±0.2               | 23.9±1.8                            | 0.284±0.003                         | 0.280±0.003                        | 0.23±0.10                            | 0.19±0.02                            |
|                         | 1                          | 100±0    | 88±6      | 6.2±0.5   | 30.8±8.2                        | 1.1±0.2               | 11.4±2.9                            | 0.286±0.001                         | 0.285±0.001                        | 0.19±0.02                            | 0.21±0.02                            |
|                         | 10                         | 100±0    | 98±5      | 4.7±0.6   | 18.6±5.2                        | 1.1±0.1               | 9.0±1.5                             | 0.288±0.002                         | 0.285±0.002                        | 0.18±0.03                            | 0.17±0.03                            |
|                         | 100                        | 100±0    | 78±5      | 5.1±0.3   | 15.7±5.2                        | 0.9±0.2               | 6.4±1.5                             | 0.288±0.002                         | 0.288±0.001                        | 0.17±0.03                            | 0.16±0.03                            |
| MBT                     | 0.01                       | 100±0    | 63±21     | 5.4±0.5   | 24.3±4.5                        | 7.3±1.1               | 5.6±0.5                             | 0.289±0.001                         | 0.180±0.016                        | 0.15±0.02                            | 0.24±0.05                            |
|                         | 0.1                        | 91±9     | 68±5      | 4.3±1.0   | 15.0±2.2                        | 7.4±0.8               | 7.5±0.7                             | 0.276±0.011                         | 0.168±0.029                        | 0.36±0.10                            | 0.20±0.07                            |
|                         | 1                          | 100±0    | 54±5      | 5.4±0.7   | 26.6±5.5                        | 5.8±0.7               | 14.1±3.3                            | 0.284±0.004                         | 0.199±0.048                        | 0.15±0.02                            | 0.17±0.03                            |
|                         | 10                         | 91±9     | 29±0      | 4.7±0.1   | 24.1±6.6                        | 1.8±0.3               | 28.4±7.7                            | 0.284±0.004                         | 0.279±0.004                        | 0.17±0.04                            | 0.19±0.03                            |
|                         | 100                        | 73±14    | 29±12     | 4.6±0.7   | 29.8±6.7                        | 1.4±0.2               | 26.3±0.7                            | 0.284±0.001                         | 0.279±0.004                        | 0.15±0.02                            | 0.15±0.04                            |
| LDH-<br>MBT             | 0.01                       | 100±0    | 73±0      | 6.2±0.9   | 17.5±5.3                        | 1.3±0.1               | 6.1±0.7                             | 0.284±0.002                         | 0.281±0.002                        | 0.19±0.03                            | 0.23±0.04                            |
|                         | 0.1                        | 100±0    | 73±0      | 6.5±0.8   | 17.6±4.1                        | 0.9±0.2               | 5.1±0.3                             | 0.290±0.001                         | 0.288±0.002                        | 0.11±0.02                            | 0.20±0.02                            |
|                         | 1                          | 100±0    | 73±0      | 6.7±0.3   | 25.5±4.4                        | 0.8±0.3               | 7.4±0.5                             | 0.267±0.004                         | 0.267±0.004                        | 0.15±0.02                            | 0.20±0.02                            |
|                         | 10                         | 100±0    | 63±5      | 5.6±0.6   | 36.3±5.5                        | 1.5±0.4               | 6.4±0.9                             | 0.272±0.008                         | 0.271±0.008                        | 0.21±0.03                            | 0.20±0.01                            |
|                         | 100                        | 82±12    | 29±0      | 4.6±0.3   | 45.0±5.8                        | 0.4±0.2               | 4.5±0.4                             | 0.268±0.005                         | 0.268±0.005                        | 0.12±0.04                            | 0.20±0.02                            |
